# Supplementary material for: Biomarkers in long COVID-19: A systematic review
Source: PubMed Central journal article supplement (PMC9895110; doi:10.3389/fmed.2023.1085988), 2023-01-20
Supplement: Table_1.pdf [file Table_1.pdf]

**Supplementary Table 1.** Search strategy and search results

Database: PubMed

Search date: 08/18/2022

|   | <b>Group</b>           | <b>Keyword</b>                                                                                                                                                                                                                                                                                                                                                                                                                                                                                                                                                                                                                                                                                                                                                                                                                                                                                                                                                                                                                                                                                                                                                                                                                                                                                                                                                                                                                                                                                                                                                                                                                                                                                                                                                                         | <b>Results</b>                                |
|---|------------------------|----------------------------------------------------------------------------------------------------------------------------------------------------------------------------------------------------------------------------------------------------------------------------------------------------------------------------------------------------------------------------------------------------------------------------------------------------------------------------------------------------------------------------------------------------------------------------------------------------------------------------------------------------------------------------------------------------------------------------------------------------------------------------------------------------------------------------------------------------------------------------------------------------------------------------------------------------------------------------------------------------------------------------------------------------------------------------------------------------------------------------------------------------------------------------------------------------------------------------------------------------------------------------------------------------------------------------------------------------------------------------------------------------------------------------------------------------------------------------------------------------------------------------------------------------------------------------------------------------------------------------------------------------------------------------------------------------------------------------------------------------------------------------------------|-----------------------------------------------|
| 1 | long COVID-19 symptoms | <p>a. COVID-19</p> <p>"SARS-CoV-2"[MeSH Terms] OR "COVID-19"[MeSH Terms] OR "Severe Acute Respiratory Syndrome Coronavirus 2"[Text Word] OR "SARS-CoV-2"[Text Word] OR "SARS-CoV2"[Text Word] OR "COVID-19"[Text Word] OR "COVID 19"[Text Word] OR "2019 novel coronavirus"[Text Word] OR "2019 Novel Coronaviruses"[Text Word] OR "2019 nCoV"[Text Word] OR "n-CoV"[Text Word] OR "Wuhan coronavirus"[Text Word] OR "Coronavirus Disease 2019"[Text Word] OR "Coronavirus Disease-19"[Text Word] OR "Coronavirus Disease 19"[Text Word] OR "SARS Coronavirus 2"[Text Word]</p> <p>b. Symptoms</p> <p>"symptom*"[Text Word] OR "clinical features"[Text Word] OR "signs"[Text Word] OR "characteristic*"[Text Word] OR "sequela*"[Text Word] OR "complication*"[Text Word] OR "manifestation*"[Text Word] OR "indication*"[Text Word] OR "syndrome*"[Text Word] OR "clinical significance"[Text Word] OR "clinical significant"[Text Word] OR "hallmarks*"[Text Word] OR "clinical presentations"[Text Word]</p> <p>c. Long COVID</p> <p>"post-acute COVID-19 syndrome" [Supplementary Concept] OR "post-acute COVID-19 syndrome"[Text Word] OR "long COVID-19 symptoms"[Text Word] OR "long COVID"[Text Word] OR "long-COVID"[Text Word] OR "long-haul COVID"[Text Word] OR "long haul COVID"[Text Word] OR "post COVID-19 syndromes"[Text Word] OR "post COVID-19 syndrome"[Text Word] OR "post-acute COVID syndrome"[Text Word] OR "post-acute COVID19 syndrome"[Text Word] OR "persistent COVID-19"[Text Word] OR "long hauler"[Text Word] OR "post-acute sequelae of SARS-Cov-2 infection"[Text Word] OR "post COVID-19 conditions"[Text Word] OR "post-COVID-19 condition"[Text Word] OR "post-acute sequelae of COVID-19"[Text Word] OR "chronic COVID syndrome"[Text Word]</p> | <p>281,414</p> <p>7,349,823</p> <p>11,272</p> |

| Group        | Keyword                                                                                                                                                                                                                                                                                                                                                                                                                                                                                                                                                                                                                                                                                                                                                                                                                                                                                                                                                                                                                                                                                                                                                                                                                                                                                                                                                                            | Results    |
|--------------|------------------------------------------------------------------------------------------------------------------------------------------------------------------------------------------------------------------------------------------------------------------------------------------------------------------------------------------------------------------------------------------------------------------------------------------------------------------------------------------------------------------------------------------------------------------------------------------------------------------------------------------------------------------------------------------------------------------------------------------------------------------------------------------------------------------------------------------------------------------------------------------------------------------------------------------------------------------------------------------------------------------------------------------------------------------------------------------------------------------------------------------------------------------------------------------------------------------------------------------------------------------------------------------------------------------------------------------------------------------------------------|------------|
|              | <p>OR "PASC"[Text Word] OR "CCS"[Text Word] OR "COVID-19 recovery"[Text Word] OR "COVID 19 recovery"[Text Word] OR "Coronavirus recovery"[Text Word] OR "COVID 19 recovery"[Text Word] OR "post-recovery symptoms"[Text Word] OR "recovered COVID 19"[Text Word] OR "post-discharge COVID 19"[Text Word] OR "post-COVID-19 manifestations"[Text Word] OR "post-COVID-19 manifestation"[Text Word] OR "post COVID manifestations"[Text Word] OR "post COVID manifestation"[Text Word] OR "post-COVID-19 rehabilitation"[Text Word] OR "COVID 19 survival"[Text Word] OR "post-COVID-19 complications"[Text Word] OR "post-COVID-19 complication"[Text Word]</p> <p><b>a AND b AND c</b></p>                                                                                                                                                                                                                                                                                                                                                                                                                                                                                                                                                                                                                                                                                         | 2,558      |
| 2 Biomarkers | <p>"biomarkers"[MeSH Terms] OR "biomarkers"[Text Word] OR "biomarker"[Text Word] OR "cytokines"[MeSH Terms] OR "cytokines"[Text Word] OR "cytokine"[Text Word] OR "chemokines"[MeSH Terms] OR "chemokines"[Text Word] OR "chemokine"[Text Word] OR "immune markers"[Text Word] OR "immune marker"[Text Word] OR "immunologic markers"[Text Word] OR "immunologic marker"[Text Word] OR "blood biomarker"[Text Word] OR "blood biomarkers"[Text Word] OR "serum biomarker"[Text Word] OR "serum biomarkers"[Text Word] OR "plasma biomarker"[Text Word] OR "plasma biomarkers"[Text Word] OR "plasma marker"[Text Word] OR "plasma markers"[Text Word] OR "serum marker"[Text Word] OR "serum markers"[Text Word] OR "blood marker"[Text Word] OR "blood markers"[Text Word] OR "blood indicator"[Text Word] OR "blood indicators"[Text Word] OR "serum indicator"[Text Word] OR "serum indicators"[Text Word] OR "plasma indicator"[Text Word] OR "plasma indicators"[Text Word] OR "plasma factors"[Text Word] OR "plasma factor"[Text Word] OR "serum factors"[Text Word] OR "serum factor"[Text Word] OR "blood factors"[Text Word] OR "blood factor"[Text Word] OR "biological marker"[Text Word] OR "biological markers"[Text Word] OR "biologic marker"[Text Word] OR "biologic markers"[Text Word] OR "laboratory markers"[Text Word] OR "laboratory marker"[Text Word]</p> | 1,899,335  |
| <b>1+2</b>   | <b>1 AND 2</b>                                                                                                                                                                                                                                                                                                                                                                                                                                                                                                                                                                                                                                                                                                                                                                                                                                                                                                                                                                                                                                                                                                                                                                                                                                                                                                                                                                     | <b>265</b> |

Database: CINAHL

Search date: 08/18/2022

|   | <b>Group</b>           | <b>Keyword</b>                                                                                                                                                                                                                                                                                                                                                                                                                                                                                                                                                                                                                                                                                                                                                                                                                                                                                                                                                                                                                                                                                                                                                                                                                                                                                                                                                                                                                                                                                                                                                                                                                                                                             | <b>Results</b>                                          |
|---|------------------------|--------------------------------------------------------------------------------------------------------------------------------------------------------------------------------------------------------------------------------------------------------------------------------------------------------------------------------------------------------------------------------------------------------------------------------------------------------------------------------------------------------------------------------------------------------------------------------------------------------------------------------------------------------------------------------------------------------------------------------------------------------------------------------------------------------------------------------------------------------------------------------------------------------------------------------------------------------------------------------------------------------------------------------------------------------------------------------------------------------------------------------------------------------------------------------------------------------------------------------------------------------------------------------------------------------------------------------------------------------------------------------------------------------------------------------------------------------------------------------------------------------------------------------------------------------------------------------------------------------------------------------------------------------------------------------------------|---------------------------------------------------------|
| 1 | long COVID-19 symptoms | <p>a. COVID-19<br/>(MH "SARS-CoV-2") OR (MH "COVID-19") OR "Severe Acute Respiratory Syndrome Coronavirus 2" OR "SARS-CoV-2" OR "SARS-CoV2" OR "COVID-19" OR "COVID 19" OR "2019 novel coronavirus" OR "2019 Novel Coronaviruses" OR "2019 nCoV" OR "n-CoV" OR "Wuhan coronavirus" OR "Coronavirus Disease 2019" OR "Coronavirus Disease-19" OR "Coronavirus Disease 19" OR "SARS Coronavirus 2"</p> <p>b. Symptoms<br/>"symptom*" OR "clinical features" OR "signs" OR "characteristic*" OR "sequela*" OR "complication*" OR "manifestation*" OR "indication*" OR "syndrome*" OR "clinical significance" OR "clinical significant" OR "hallmarks*" OR "clinical presentations"</p> <p>c. Long COVID<br/>"post-acute COVID-19 syndrome" OR "long COVID-19 symptoms" OR "long COVID" OR "long-COVID" OR "long-haul COVID" OR "long haul COVID" OR "post COVID-19 syndromes" OR "post COVID-19 syndrome" OR "post-acute COVID syndrome" OR "post-acute COVID19 syndrome" OR "persistent COVID-19" OR "long hauler" OR "post-acute sequelae of SARS-Cov-2 infection" OR "post COVID-19 conditions" OR "post-COVID-19 condition" OR "post-acute sequelae of COVID-19" OR "chronic COVID syndrome" OR "PASC" OR "CCS" OR "COVID-19 recovery" OR "COVID 19 recovery" OR "Coronavirus recovery" OR "COVID 19 recovery" OR "post-recovery symptoms" OR "recovered COVID 19" OR "post-discharge COVID 19" OR "post-COVID-19 manifestations" OR "post-COVID-19 manifestation" OR "post COVID manifestations" OR "post COVID manifestation" OR "post-COVID-19 rehabilitation" OR "COVID 19 survival" OR "post-COVID-19 complications" OR "post-COVID-19 complication"</p> <p><b>a AND b AND c</b></p> | <p>106,376</p> <p>1,640,718</p> <p>2,397</p> <p>622</p> |
| 2 | Biomarkers             | (MH "biomarkers") OR "biomarkers" OR "biomarker" OR (MH "cytokines") OR "cytokines" OR "cytokine" OR (MH                                                                                                                                                                                                                                                                                                                                                                                                                                                                                                                                                                                                                                                                                                                                                                                                                                                                                                                                                                                                                                                                                                                                                                                                                                                                                                                                                                                                                                                                                                                                                                                   | 157,389                                                 |

| <b>Group</b> | <b>Keyword</b>                                                                                                                                                                                                                                                                                                                                                                                                                                                                                                                                                                                                                                                                                                                                                                                                               | <b>Results</b> |
|--------------|------------------------------------------------------------------------------------------------------------------------------------------------------------------------------------------------------------------------------------------------------------------------------------------------------------------------------------------------------------------------------------------------------------------------------------------------------------------------------------------------------------------------------------------------------------------------------------------------------------------------------------------------------------------------------------------------------------------------------------------------------------------------------------------------------------------------------|----------------|
|              | "chemokines") OR "chemokines" OR "chemokine" OR<br>"immune markers" OR "immune marker" OR "immunologic<br>markers" OR "immunologic marker" OR "blood biomarker"<br>OR "blood biomarkers" OR "serum biomarker" OR "serum<br>biomarkers" OR "plasma biomarker" OR "plasma<br>biomarkers" OR "plasma marker" OR "plasma markers" OR<br>"serum marker" OR "serum markers" OR "blood marker" OR<br>"blood markers" OR "blood indicator" OR "blood indicators"<br>OR "serum indicator" OR "serum indicators" OR "plasma<br>indicator" OR "plasma indicators" OR "plasma factors" OR<br>"plasma factor" OR "serum factors" OR "serum factor" OR<br>"blood factors" OR "blood factor" OR "biological marker"<br>OR "biological markers" OR "biologic marker" OR "biologic<br>markers" OR "laboratory markers" OR "laboratory marker" |                |
| <b>1+2</b>   | <b>1 AND 2</b>                                                                                                                                                                                                                                                                                                                                                                                                                                                                                                                                                                                                                                                                                                                                                                                                               | <b>23</b>      |

Database: Embase

Search date: 08/18/2022

|   | <b>Group</b>           | <b>Keyword</b>                                                                                                                                                                                                                                                                                                                                                                                                                                                                                                                                                                                                                                                                                                                                                                                                                                                                                                                                                                                                                                                                                                                                                                                                                                                                                                                                                                                                                                                                                                                                                                                                                                                                                                                                                                                                                                                                                                                                                                       | <b>Results</b>                                |
|---|------------------------|--------------------------------------------------------------------------------------------------------------------------------------------------------------------------------------------------------------------------------------------------------------------------------------------------------------------------------------------------------------------------------------------------------------------------------------------------------------------------------------------------------------------------------------------------------------------------------------------------------------------------------------------------------------------------------------------------------------------------------------------------------------------------------------------------------------------------------------------------------------------------------------------------------------------------------------------------------------------------------------------------------------------------------------------------------------------------------------------------------------------------------------------------------------------------------------------------------------------------------------------------------------------------------------------------------------------------------------------------------------------------------------------------------------------------------------------------------------------------------------------------------------------------------------------------------------------------------------------------------------------------------------------------------------------------------------------------------------------------------------------------------------------------------------------------------------------------------------------------------------------------------------------------------------------------------------------------------------------------------------|-----------------------------------------------|
| 1 | long COVID-19 symptoms | <p>a. COVID-19<br/>'SARS-CoV-2'/exp/mj OR 'COVID-19'/exp/mj OR 'Severe Acute Respiratory Syndrome Coronavirus 2':ti,ab,kw OR 'SARS-CoV-2':ti,ab,kw OR 'SARS-CoV2':ti,ab,kw OR 'COVID-19':ti,ab,kw OR 'COVID 19':ti,ab,kw OR '2019 novel coronavirus':ti,ab,kw OR '2019 Novel Coronaviruses':ti,ab,kw OR '2019 nCoV':ti,ab,kw OR 'n-CoV':ti,ab,kw OR 'Wuhan coronavirus':ti,ab,kw OR 'Coronavirus Disease 2019':ti,ab,kw OR 'Coronavirus Disease-19':ti,ab,kw OR 'Coronavirus Disease 19':ti,ab,kw OR 'SARS Coronavirus 2':ti,ab,kw</p> <p>b. Symptoms<br/>'symptom*':ti,ab,kw OR 'clinical features':ti,ab,kw OR 'signs':ti,ab,kw OR 'characteristic*':ti,ab,kw OR 'sequela*':ti,ab,kw OR 'complication*':ti,ab,kw OR 'manifestation*':ti,ab,kw OR 'indication*':ti,ab,kw OR 'syndrome*':ti,ab,kw OR 'clinical significance':ti,ab,kw OR 'clinical significant':ti,ab,kw OR 'hallmarks*':ti,ab,kw OR 'clinical presentations':ti,ab,kw</p> <p>a. Long COVID<br/>'post-acute COVID-19 syndrome':ti,ab,kw OR 'long COVID-19 symptoms':ti,ab,kw OR 'long covid'/exp OR 'long COVID':ti,ab,kw OR 'long-COVID':ti,ab,kw OR 'long-haul COVID':ti,ab,kw OR 'long haul COVID':ti,ab,kw OR 'post COVID-19 syndromes':ti,ab,kw OR 'post COVID-19 syndrome':ti,ab,kw OR 'post-acute COVID syndrome':ti,ab,kw OR 'post-acute COVID19 syndrome':ti,ab,kw OR 'persistent COVID-19':ti,ab,kw OR 'long hauler':ti,ab,kw OR 'post-acute sequelae of SARS-Cov-2 infection':ti,ab,kw OR 'post COVID-19 conditions':ti,ab,kw OR 'post-COVID-19 condition':ti,ab,kw OR 'post-acute sequelae of COVID-19':ti,ab,kw OR 'chronic COVID syndrome':ti,ab,kw OR 'PASC':ti,ab,kw OR 'CCS':ti,ab,kw OR 'COVID-19 recovery':ti,ab,kw OR 'COVID 19 recovery':ti,ab,kw OR 'Coronavirus recovery':ti,ab,kw OR 'COVID 19 recovery':ti,ab,kw OR 'post-recovery symptoms':ti,ab,kw OR 'recovered COVID 19':ti,ab,kw OR 'post-discharge COVID 19':ti,ab,kw OR 'post-COVID-19 manifestations':ti,ab,kw OR 'post-COVID-</p> | <p>301,800</p> <p>7,359,993</p> <p>16,914</p> |

| Group        | Keyword                                                                                                                                                                                                                                                                                                                                                                                                                                                                                                                                                                                                                                                                                                                                                                                                                                                                                                                                                                                                                                                                                                                                                                                                                                                                      | Results    |
|--------------|------------------------------------------------------------------------------------------------------------------------------------------------------------------------------------------------------------------------------------------------------------------------------------------------------------------------------------------------------------------------------------------------------------------------------------------------------------------------------------------------------------------------------------------------------------------------------------------------------------------------------------------------------------------------------------------------------------------------------------------------------------------------------------------------------------------------------------------------------------------------------------------------------------------------------------------------------------------------------------------------------------------------------------------------------------------------------------------------------------------------------------------------------------------------------------------------------------------------------------------------------------------------------|------------|
|              | 19 manifestation':ti,ab,kw OR 'post COVID manifestations':ti,ab,kw OR 'post COVID manifestation':ti,ab,kw OR 'post-COVID-19 rehabilitation':ti,ab,kw OR 'COVID 19 survival':ti,ab,kw OR 'post-COVID-19 complications':ti,ab,kw OR 'post-COVID-19 complication':ti,ab,kw<br><br><b>a AND b AND c</b>                                                                                                                                                                                                                                                                                                                                                                                                                                                                                                                                                                                                                                                                                                                                                                                                                                                                                                                                                                          | 2,946      |
| 2 Biomarkers | 'biomarkers'/exp/mj OR 'biomarkers':ti,ab,kw OR 'biomarker':ti,ab,kw OR 'cytokines'/exp/mj OR 'cytokines':ti,ab,kw OR 'cytokine':ti,ab,kw OR 'chemokines'/exp/mj OR 'chemokines':ti,ab,kw OR 'chemokine':ti,ab,kw OR 'immune markers':ti,ab,kw OR 'immune marker':ti,ab,kw OR 'immunologic markers':ti,ab,kw OR 'immunologic marker':ti,ab,kw OR 'blood biomarker':ti,ab,kw OR 'blood biomarkers':ti,ab,kw OR 'serum biomarker':ti,ab,kw OR 'serum biomarkers':ti,ab,kw OR 'plasma biomarker':ti,ab,kw OR 'plasma biomarkers':ti,ab,kw OR 'plasma marker':ti,ab,kw OR 'plasma markers':ti,ab,kw OR 'serum marker':ti,ab,kw OR 'serum markers':ti,ab,kw OR 'blood marker':ti,ab,kw OR 'blood markers':ti,ab,kw OR 'blood indicator':ti,ab,kw OR 'blood indicators':ti,ab,kw OR 'serum indicator':ti,ab,kw OR 'serum indicators':ti,ab,kw OR 'plasma indicator':ti,ab,kw OR 'plasma indicators':ti,ab,kw OR 'plasma factors':ti,ab,kw OR 'plasma factor':ti,ab,kw OR 'serum factors':ti,ab,kw OR 'serum factor':ti,ab,kw OR 'blood factors':ti,ab,kw OR 'blood factor':ti,ab,kw OR 'biological marker':ti,ab,kw OR 'biological markers':ti,ab,kw OR 'biologic marker':ti,ab,kw OR 'biologic markers':ti,ab,kw OR 'laboratory markers':ti,ab,kw OR 'laboratory marker':ti,ab,kw | 1,645,283  |
| <b>1+2</b>   | <b>1 AND 2</b>                                                                                                                                                                                                                                                                                                                                                                                                                                                                                                                                                                                                                                                                                                                                                                                                                                                                                                                                                                                                                                                                                                                                                                                                                                                               | <b>286</b> |
