# Supplementary material for: Biomarkers in long COVID-19: A systematic review
Source: PubMed Central journal article supplement (PMC9895110; doi:10.3389/fmed.2023.1085988), 2023-01-20
Supplement: Table_3.pdf [file Table_3.pdf]

**Supplemental Table 3.** Quality Assessment of Each Study Included in the Systematic Review by Using the Modified REMARK Questionnaire

| Article           | Item of REMARK questionnaire |      |      |      |      |      |      |      | Percentage of Yes |
|-------------------|------------------------------|------|------|------|------|------|------|------|-------------------|
|                   | 1                            | 2    | 3    | 4    | 5    | 6    | 7    | 8    |                   |
| 1                 | Yes                          | No   | No   | No   | Yes  | No   | Yes  | Yes  | 50                |
| 2                 | Yes                          | No   | No   | No   | Yes  | No   | Yes  | Yes  | 50                |
| 3                 | Yes                          | No   | Yes  | Yes  | Yes  | Yes  | Yes  | Yes  | 87.5              |
| 4                 | No                           | No   | Yes  | Yes  | Yes  | Yes  | Yes  | Yes  | 75                |
| 5                 | Yes                          | No   | No   | Yes  | Yes  | No   | Yes  | Yes  | 62.5              |
| 6                 | Yes                          | No   | Yes  | No   | Yes  | Yes  | No   | Yes  | 62.5              |
| 7                 | Yes                          | No   | No   | Yes  | Yes  | Yes  | No   | Yes  | 62.5              |
| 8                 | Yes                          | No   | Yes  | Yes  | Yes  | Yes  | Yes  | Yes  | 87.5              |
| 9                 | Yes                          | No   | Yes  | No   | Yes  | No   | Yes  | Yes  | 62.5              |
| 10                | Yes                          | No   | No   | Yes  | Yes  | No   | Yes  | Yes  | 62.5              |
| 11                | Yes                          | No   | No   | Yes  | Yes  | Yes  | Yes  | Yes  | 75                |
| 12                | Yes                          | No   | Yes  | Yes  | Yes  | Yes  | Yes  | Yes  | 87.5              |
| 13                | Yes                          | No   | No   | No   | Yes  | No   | Yes  | Yes  | 50                |
| 14                | Yes                          | No   | Yes  | Yes  | Yes  | No   | Yes  | Yes  | 75                |
| 15                | Yes                          | No   | Yes  | Yes  | Yes  | Yes  | Yes  | Yes  | 87.5              |
| 16                | Yes                          | No   | Yes  | Yes  | Yes  | Yes  | Yes  | Yes  | 87.5              |
| 17                | Yes                          | No   | Yes  | Yes  | Yes  | Yes  | No   | Yes  | 75                |
| 18                | Yes                          | No   | Yes  | No   | Yes  | Yes  | Yes  | Yes  | 75                |
| 19                | Yes                          | Yes  | Yes  | Yes  | No   | Yes  | No   | Yes  | 75                |
| 20                | Yes                          | No   | No   | Yes  | Yes  | No   | Yes  | No   | 50                |
| 21                | Yes                          | Yes  | No   | Yes  | Yes  | No   | Yes  | Yes  | 75                |
| 22                | Yes                          | Yes  | No   | Yes  | Yes  | No   | Yes  | Yes  | 75                |
| 23                | Yes                          | No   | Yes  | Yes  | Yes  | Yes  | Yes  | Yes  | 87.5              |
| 24                | Yes                          | No   | Yes  | Yes  | Yes  | Yes  | Yes  | Yes  | 87.5              |
| 25                | Yes                          | No   | Yes  | No   | Yes  | Yes  | Yes  | Yes  | 75                |
| 26                | Yes                          | No   | Yes  | Yes  | Yes  | Yes  | Yes  | Yes  | 87.5              |
| 27                | Yes                          | No   | No   | No   | Yes  | No   | No   | Yes  | 37.5              |
| 28                | Yes                          | No   | No   | No   | Yes  | Yes  | Yes  | Yes  | 62.5              |
| Percentage of Yes | 96.4                         | 10.7 | 57.1 | 67.9 | 96.4 | 60.7 | 82.1 | 96.4 |                   |
